# Supplementary material for: A dosimetric model for the heterogeneous delivery of radioactive nanoparticles In vivo: a feasibility study
Source: Radiat Oncol. 2017 Mar 17;12:54. doi: 10.1186/s13014-017-0794-z (PMC5356254; doi:10.1186/s13014-017-0794-z)
Supplement: Additional file 4: — Table S2 (Dose Kernels for 177Lu, 90Y, and 33P) and S3 (Interpolated Dose Kernels for 177Lu, 90Y, and 33P). (XLSX 78 kb) [file 13014_2017_794_MOESM4_ESM.xlsx]

## Sheet: Table S2 Dose Kernels
	Lu-177							Y-90							P-33
	r (cm)	r^2*J(nGy-cm^2/Bq-hr)	nGy/(Bq-hr)	Mass of Anulus (kg)	nJ/Bq-hr	J/Bq-hr		r (cm)	r^2*J(nGy-cm^2/Bq-hr)	nGy/(Bq-hr)	Mass of Anulus (kg)	nJ/Bq-hr	J/Bq-hr		r (cm)	r^2*J(nGy-cm^2/Bq-hr)	nGy/(Bq-hr)	Mass of Anulus (kg)	nJ/Bq-hr	J/Bq-hr
	0	169.6	2300000	4.18879e-09	0.00963422	9.63422e-12		0.0001	104	1400000	2.14466e-09	0.00300252	3.00252e-12		0.001	466.6	4.666e+08	9.94838e-12	0.00464191	4.64191e-12
	0.01	143	650000	2.93215e-08	0.019059	1.9059e-11		0.008	99.6	470000	1.50126e-08	0.00705593	7.05593e-12		0.0015	285.1	1.26711e+08	9.89602e-11	0.0125394	1.25394e-11
	0.02	102.2	255500	7.9587e-08	0.0203345	2.03345e-11		0.016	99.2	270000	4.07486e-08	0.0110021	1.10021e-11		0.003	243.7	2.70778e+07	2.68606e-10	0.00727326	7.27326e-12
	0.03	76.77	85300	1.54985e-07	0.0132202	1.32202e-11		0.024	98.9	171701	7.93524e-08	0.0136249	1.36249e-11		0.0045	213	1.05185e+07	5.23075e-10	0.00550198	5.50198e-12
	0.04	57.05	35656.2	2.55516e-07	0.00911075	9.11075e-12		0.032	98.6	96289.1	1.30824e-07	0.0125969	1.25969e-11		0.006	187.8	5.21667e+06	8.62367e-10	0.00449868	4.49868e-12
	0.05	41.23	16492	3.8118e-07	0.00628642	6.28642e-12		0.04	98.3	61437.5	1.87658e-06	0.115292	1.15292e-10		0.0075	166.1	2.95289e+06	1.28648e-09	0.00379884	3.79884e-12
	0.06	28.8	8000	1.23988e-06	0.00991906	9.91906e-12		0.08	96.4	15062.5	5.09357e-06	0.0767219	7.67219e-11		0.009	147.2	1.81728e+06	1.79542e-09	0.00326279	3.26279e-12
	0.08	12.41	1939.06	2.04413e-06	0.0039637	3.9637e-12		0.12	93.5	6493.06	9.91906e-06	0.064405	6.4405e-11		0.0105	130.2	1.18095e+06	2.38918e-09	0.00282151	2.82151e-12
	0.1	4.272	427.2	3.04944e-06	0.00130272	1.30272e-12		0.16	89.7	3503.91	1.6353e-05	0.0572995	5.72995e-11		0.012	115	798611	3.06777e-09	0.00244995	2.44995e-12
	0.12	1.044	72.5	4.25581e-06	0.000308546	3.08546e-13		0.2	85.1	2127.5	2.43955e-05	0.0519015	5.19015e-11		0.0135	101.2	555281	3.83117e-09	0.00212738	2.12738e-12
	0.14	0.152	7.7551	5.66324e-06	4.3919e-05	4.3919e-14		0.24	79.6	1381.94	3.40465e-05	0.0470504	4.70504e-11		0.015	88.7	394222	4.6794e-09	0.00184472	1.84472e-12
	0.16	0.01	0.390625	3.42224e-06	1.33681e-06	1.33681e-15		0.28	73.6	938.776	4.5306e-05	0.0425321	4.25321e-11		0.0165	77.4	284298	5.61246e-09	0.00159561	1.59561e-12
	0.17	0.002	0.0692042	2.25682e-06	1.56181e-07	1.56181e-16		0.32	67.1	655.273	5.81739e-05	0.0381198	3.81198e-11		0.018	67.2	207407	6.63033e-09	0.00137518	1.37518e-12
	0.176	0	0		0	0		0.36	60.4	466.049	7.26504e-05	0.0338587	3.38587e-11		0.0195	58.1	152794	7.73303e-09	0.00118156	1.18156e-12
					Total J/Bq-hr	9.31845e-11		0.4	53.5	334.375	8.87353e-05	0.0296709	2.96709e-11		0.021	49.9	113152	8.92055e-09	0.00100938	1.00938e-12
					Total J/hr	6.24057e-06		0.44	46.6	240.702	0.000106429	0.0256177	2.56177e-11		0.0225	42.5	83950.6	1.01929e-08	0.0008557	8.557e-13
					Tumor Weight (kg)	0.0001315		0.48	39.7	172.309	0.000125731	0.0216645	2.16645e-11		0.024	36	62500	1.15501e-08	0.000721879	7.21879e-13
					Gy/hr in tumor (kernel*)	0.0474568		0.52	33.2	122.781	0.000146641	0.0180048	1.80048e-11		0.0255	30.3	46597.5	1.29921e-08	0.000605397	6.05397e-13
					Gy/hr in tumor (MIRD)	0.0431803		0.56	27	86.0969	0.00016916	0.0145642	1.45642e-11		0.027	25.2	34567.9	1.45189e-08	0.000501887	5.01887e-13
					*Calculation was performed using dose kernels from literature assuming all activity was contained in a single point source in the tumor			0.6	21.3	59.1667	0.000193288	0.0114362	1.14362e-11		0.0285	20.8	25607.9	1.61305e-08	0.000413068	4.13068e-13
								0.64	16.3	39.7949	0.000219023	0.00871602	8.71602e-12		0.03	17.1	19000	1.7827e-08	0.000338712	3.38712e-13
								0.68	12	25.9516	0.000246368	0.00639363	6.39363e-12		0.0315	13.8	13907.8	1.96083e-08	0.000272707	2.72707e-13
								0.72	8.5	16.3966	0.000275321	0.00451433	4.51433e-12		0.033	11	10101	2.14744e-08	0.000216913	2.16913e-13
								0.76	5.7	9.86842	0.000305882	0.00301857	3.01857e-12		0.0345	8.7	7309.39	2.34253e-08	0.000171225	1.71225e-13
								0.8	3.6	5.625	0.000338052	0.00190154	1.90154e-12		0.036	6.8	5246.91	2.5461e-08	0.000133592	1.33592e-13
								0.84	2.2	3.11791	0.000371831	0.00115934	1.15934e-12		0.0375	5.2	3697.78	2.75816e-08	0.000101991	1.01991e-13
								0.88	1.2	1.54959	0.000407217	0.000631019	6.31019e-13		0.039	4	2629.85	2.9787e-08	7.83353e-05	7.83353e-14
								0.92	0.6	0.708885	0.000444213	0.000314896	3.14896e-13		0.0405	2.9	1768.02	3.20772e-08	5.67133e-05	5.67133e-14
								0.96	0	0		0	0		0.042	2.1	1190.48	3.44523e-08	4.10146e-05	4.10146e-14
												Total J/Bq-hr	7.21756e-10		0.0435	1.5	792.707	3.69121e-08	2.92605e-05	2.92605e-14
												Total J/hr	4.8336e-05		0.045	0	0		0	0
												Tumor Weight (kg)	0.0001315						Total J/Bq-hr	6.04605e-11
												Gy/hr in tumor (kernel*)	0.367574						Total J/hr	4.04904e-06
												Gy/hr in tumor (MIRD)	0.271713						Tumor Weight (kg)	0.0001315
																			Gy/hr in tumor (kernel*)	0.0307912
																			Gy/hr in tumor (MIRD)	0.022442

## Sheet: Table S3 Interpolated Kernels
				J/Bq-hr per Nucleus
		cm	mm	Lu-177	Y-90	P-33
		0	0	3.20704e-14	7.33038e-15	3.86826e-13
		0.001	0.01	7.10598e-15	2.74366e-15	1.02269e-13
		0.002	0.02	3.54807e-15	1.63583e-15	5.49972e-14
		0.003	0.03	2.29959e-15	1.16097e-15	1.63812e-14
		0.004	0.04	1.68453e-15	8.33981e-16	8.72625e-15
		0.005	0.05	1.51757e-15	6.89539e-16	5.03844e-15
		0.006	0.06	1.22654e-15	5.87585e-16	2.95189e-15
		0.007	0.07	1.02628e-15	5.11826e-16	2.04574e-15
		0.008	0.08	8.80708e-16	3.3047e-16	1.45885e-15
		0.009	0.09	7.70424e-16	3.07281e-16	1.00332e-15
		0.01	0.1	6.83625e-16	2.86508e-16	7.65898e-16
		0.011	0.11	5.75998e-16	2.67998e-16	5.92256e-16
		0.012	0.12	4.92671e-16	2.43289e-16	4.35315e-16
		0.013	0.13	4.2679e-16	2.29733e-16	3.48669e-16
		0.014	0.14	3.73765e-16	2.17472e-16	2.80953e-16
		0.015	0.15	3.33743e-16	2.0636e-16	2.13214e-16
		0.016	0.16	2.97455e-16	1.79063e-16	1.75456e-16
		0.017	0.17	2.67042e-16	1.6755e-16	1.44687e-16
		0.018	0.18	2.41289e-16	1.57412e-16	1.11586e-16
		0.019	0.19	2.19277e-16	1.48419e-16	9.33663e-17
		0.02	0.2	2.54462e-16	1.38358e-16	7.80837e-17
		0.021	0.21	2.21729e-16	1.31329e-16	6.06451e-17
		0.022	0.22	1.93679e-16	1.24975e-16	5.11597e-17
		0.023	0.23	1.69499e-16	1.19204e-16	4.30346e-17
		0.024	0.24	1.4854e-16	1.2378e-16	3.34018e-17
		0.025	0.25	1.23445e-16	1.1272e-16	2.83461e-17
		0.026	0.26	1.07975e-16	1.02945e-16	2.39439e-17
		0.027	0.27	9.43867e-17	9.42677e-17	1.84327e-17
		0.028	0.28	8.24063e-17	8.69452e-17	1.56435e-17
		0.029	0.29	7.18058e-17	7.99977e-17	1.31836e-17
		0.03	0.3	7.30131e-17	7.37593e-17	1.01132e-17
		0.031	0.31	6.5863e-17	6.81393e-17	8.55755e-18
		0.032	0.32	5.94411e-17	6.70791e-17	7.17122e-18
		0.033	0.33	5.36571e-17	6.19652e-17	5.36859e-18
		0.034	0.34	4.84341e-17	5.7323e-17	4.52881e-18
		0.035	0.35	4.16683e-17	5.30981e-17	3.77379e-18
		0.036	0.36	3.74887e-17	4.82589e-17	2.78525e-18
		0.037	0.37	3.36898e-17	4.47865e-17	2.3266e-18
		0.038	0.38	3.02298e-17	4.16051e-17	1.91123e-18
		0.039	0.39	2.70725e-17	3.86843e-17	1.39456e-18
		0.04	0.4	2.85232e-17	9.15846e-17	1.14347e-18
		0.041	0.41	2.61403e-17	8.63495e-17	9.14671e-19
		0.042	0.42	2.39474e-17	8.14999e-17	6.30722e-19
		0.043	0.43	2.19263e-17	7.69998e-17	3.01029e-19
		0.044	0.44	2.00606e-17	7.28173e-17	0
		0.045	0.45	1.74833e-17	6.89241e-17
		0.046	0.46	1.59231e-17	6.52949e-17
		0.047	0.47	1.44774e-17	6.19069e-17
		0.048	0.48	1.31362e-17	5.874e-17
		0.049	0.49	1.18904e-17	5.57758e-17
		0.05	0.5	5.81941e-18	5.2998e-17
		0.051	0.51	6.45161e-18	5.03919e-17
		0.052	0.52	7.03189e-18	4.79439e-17
		0.053	0.53	7.56467e-18	4.5642e-17
		0.054	0.54	8.05398e-18	4.34753e-17
		0.055	0.55	9.2405e-18	4.14336e-17
		0.056	0.56	9.62751e-18	3.9508e-17
		0.057	0.57	9.98224e-18	3.76901e-17
		0.058	0.58	1.03073e-17	3.59724e-17
		0.059	0.59	1.0605e-17	3.43478e-17
		0.06	0.6	8.18776e-18	3.23985e-17
		0.061	0.61	7.67765e-18	3.09552e-17
		0.062	0.62	7.19572e-18	2.95869e-17
		0.063	0.63	6.74011e-18	2.82887e-17
		0.064	0.64	6.30907e-18	2.70562e-17
		0.065	0.65	5.90102e-18	2.58852e-17
		0.066	0.66	5.51446e-18	2.47719e-17
		0.067	0.67	5.14806e-18	2.37127e-17
		0.068	0.68	4.80054e-18	2.27043e-17
		0.069	0.69	4.47075e-18	2.17437e-17
		0.07	0.7	3.97039e-18	2.08282e-17
		0.071	0.71	3.6781e-18	1.99549e-17
		0.072	0.72	3.4003e-18	1.91216e-17
		0.073	0.73	3.13616e-18	1.8326e-17
		0.074	0.74	2.88488e-18	1.75658e-17
		0.075	0.75	2.64573e-18	1.68393e-17
		0.076	0.76	2.41801e-18	1.61445e-17
		0.077	0.77	2.20109e-18	1.54797e-17
		0.078	0.78	1.99437e-18	1.48433e-17
		0.079	0.79	1.79729e-18	1.42339e-17
		0.08	0.8	1.91587e-18	1.38174e-17
		0.081	0.81	1.80655e-18	1.34079e-17
		0.082	0.82	1.70193e-18	1.30142e-17
		0.083	0.83	1.60178e-18	1.26353e-17
		0.084	0.84	1.50586e-18	1.22707e-17
		0.085	0.85	1.41397e-18	1.19195e-17
		0.086	0.86	1.3259e-18	1.15812e-17
		0.087	0.87	1.24146e-18	1.12552e-17
		0.088	0.88	1.16048e-18	1.09408e-17
		0.089	0.89	1.08279e-18	1.06376e-17
		0.09	0.9	9.57461e-19	1.03451e-17
		0.091	0.91	8.86986e-19	1.00628e-17
		0.092	0.92	8.19319e-19	9.79013e-18
		0.093	0.93	7.54328e-19	9.52681e-18
		0.094	0.94	6.9189e-19	9.27237e-18
		0.095	0.95	6.31889e-19	9.02645e-18
		0.096	0.96	5.74212e-19	8.78868e-18
		0.097	0.97	5.18757e-19	8.55872e-18
		0.098	0.98	4.65424e-19	8.33623e-18
		0.099	0.99	4.1412e-19	8.12091e-18
		0.1	1	4.22501e-19	7.86484e-18
		0.101	1.01	3.99139e-19	7.66393e-18
		0.102	1.02	3.76603e-19	7.46933e-18
		0.103	1.03	3.5486e-19	7.28078e-18
		0.104	1.04	3.33876e-19	7.09804e-18
		0.105	1.05	3.1362e-19	6.92089e-18
		0.106	1.06	2.94063e-19	6.74912e-18
		0.107	1.07	2.75176e-19	6.5825e-18
		0.108	1.08	2.56931e-19	6.42086e-18
		0.109	1.09	2.39304e-19	6.26399e-18
		0.11	1.1	2.09549e-19	6.11173e-18
		0.111	1.11	1.93312e-19	5.96389e-18
		0.112	1.12	1.77617e-19	5.82032e-18
		0.113	1.13	1.62443e-19	5.68087e-18
		0.114	1.14	1.47769e-19	5.54537e-18
		0.115	1.15	1.33577e-19	5.4137e-18
		0.116	1.16	1.19848e-19	5.28571e-18
		0.117	1.17	1.06566e-19	5.16128e-18
		0.118	1.18	9.37126e-20	5.04027e-18
		0.119	1.19	8.12729e-20	4.92258e-18
		0.12	1.2	7.27452e-20	5.00262e-18
		0.121	1.21	6.87518e-20	4.90181e-18
		0.122	1.22	6.48785e-20	4.80361e-18
		0.123	1.23	6.11212e-20	4.70794e-18
		0.124	1.24	5.74757e-20	4.61471e-18
		0.125	1.25	5.39382e-20	4.52384e-18
		0.126	1.26	5.05049e-20	4.43525e-18
		0.127	1.27	4.71723e-20	4.34888e-18
		0.128	1.28	6.27519e-20	4.26465e-18
		0.129	1.29	4.07954e-20	4.18249e-18
		0.13	1.3	3.53168e-20	4.10233e-18
		0.131	1.31	3.23906e-20	4.02413e-18
		0.132	1.32	2.95484e-20	3.94781e-18
		0.133	1.33	2.67873e-20	3.87331e-18
		0.134	1.34	2.41048e-20	3.80059e-18
		0.135	1.35	2.14983e-20	3.72958e-18
		0.136	1.36	1.89653e-20	3.66024e-18
		0.137	1.37	1.65035e-20	3.59251e-18
		0.138	1.38	1.41105e-20	3.52635e-18
		0.139	1.39	1.17842e-20	3.46171e-18
		0.14	1.4	8.00558e-21	3.38449e-18
		0.141	1.41	7.56052e-21	3.32296e-18
		0.142	1.42	7.12713e-21	3.26282e-18
		0.143	1.43	6.70503e-21	3.20402e-18
		0.144	1.44	6.2939e-21	3.14654e-18
		0.145	1.45	5.89341e-21	3.09032e-18
		0.146	1.46	5.50322e-21	3.03535e-18
		0.147	1.47	5.12303e-21	2.98157e-18
		0.148	1.48	4.75256e-21	2.92897e-18
		0.149	1.49	4.3915e-21	2.87749e-18
		0.15	1.5	3.74584e-21	2.82713e-18
		0.151	1.51	3.40667e-21	2.77784e-18
		0.152	1.52	3.07605e-21	2.72959e-18
		0.153	1.53	2.75372e-21	2.68236e-18
		0.154	1.54	2.43946e-21	2.63612e-18
		0.155	1.55	2.13302e-21	2.59085e-18
		0.156	1.56	1.83419e-21	2.54651e-18
		0.157	1.57	1.54276e-21	2.50309e-18
		0.158	1.58	1.25851e-21	2.46056e-18
		0.159	1.59	9.81248e-22	2.41889e-18
		0.16	1.6	3.59449e-22	2.48072e-18
		0.161	1.61	3.26721e-22	2.44201e-18
		0.162	1.62	2.94768e-22	2.40406e-18
		0.163	1.63	2.6357e-22	2.36686e-18
		0.164	1.64	2.33107e-22	2.33038e-18
		0.165	1.65	1.76418e-22	2.2946e-18
		0.166	1.66	1.47688e-22	2.25951e-18
		0.167	1.67	1.1963e-22	2.2251e-18
		0.168	1.68	9.22247e-23	2.19134e-18
		0.169	1.69	1.6819e-22	2.15822e-18
		0.17	1.7	5.59639e-23	2.12573e-18
		0.171	1.71	4.91672e-23	2.09384e-18
		0.172	1.72	4.2524e-23	2.06255e-18
		0.173	1.73	2.40201e-23	2.03184e-18
		0.174	1.74	1.78092e-23	2.00169e-18
		0.175	1.75	2.93447e-23	1.9721e-18
		0.176	1.76	0	1.94305e-18
		0.177	1.77		1.91452e-18
		0.178	1.78		1.88651e-18
		0.179	1.79		1.85901e-18
		0.18	1.8		1.82552e-18
		0.181	1.81		1.79906e-18
		0.182	1.82		1.77307e-18
		0.183	1.83		1.74753e-18
		0.184	1.84		1.72245e-18
		0.185	1.85		1.6978e-18
		0.186	1.86		1.67358e-18
		0.187	1.87		1.64978e-18
		0.188	1.88		1.62638e-18
		0.189	1.89		1.60339e-18
		0.19	1.9		1.58079e-18
		0.191	1.91		1.55858e-18
		0.192	1.92		1.53674e-18
		0.193	1.93		1.51526e-18
		0.194	1.94		1.49415e-18
		0.195	1.95		1.47338e-18
		0.196	1.96		1.45297e-18
		0.197	1.97		1.43288e-18
		0.198	1.98		1.41313e-18
		0.199	1.99		1.3937e-18
		0.2	2		1.43914e-18
		0.201	2.01		1.42023e-18
		0.202	2.02		1.40161e-18
		0.203	2.03		1.3833e-18
		0.204	2.04		1.36527e-18
		0.205	2.05		1.34753e-18
		0.206	2.06		1.33006e-18
		0.207	2.07		1.31287e-18
		0.208	2.08		1.29595e-18
		0.209	2.09		1.27929e-18
		0.21	2.1		1.26289e-18
		0.211	2.11		1.24674e-18
		0.212	2.12		1.23084e-18
		0.213	2.13		1.21518e-18
		0.214	2.14		1.19975e-18
		0.215	2.15		1.18456e-18
		0.216	2.16		1.1696e-18
		0.217	2.17		1.15487e-18
		0.218	2.18		1.14035e-18
		0.219	2.19		1.12605e-18
		0.22	2.2		1.10807e-18
		0.221	2.21		1.09422e-18
		0.222	2.22		1.08058e-18
		0.223	2.23		1.06714e-18
		0.224	2.24		1.05389e-18
		0.225	2.25		1.04084e-18
		0.226	2.26		1.02798e-18
		0.227	2.27		1.0153e-18
		0.228	2.28		1.0028e-18
		0.229	2.29		9.90484e-19
		0.23	2.3		9.78341e-19
		0.231	2.31		9.66372e-19
		0.232	2.32		9.54571e-19
		0.233	2.33		9.42937e-19
		0.234	2.34		9.31466e-19
		0.235	2.35		9.20155e-19
		0.236	2.36		9.09002e-19
		0.237	2.37		8.98004e-19
		0.238	2.38		8.87158e-19
		0.239	2.39		8.76462e-19
		0.24	2.4		9.08376e-19
		0.241	2.41		8.97842e-19
		0.242	2.42		8.87451e-19
		0.243	2.43		8.77201e-19
		0.244	2.44		8.67087e-19
		0.245	2.45		8.57109e-19
		0.246	2.46		8.47265e-19
		0.247	2.47		8.37551e-19
		0.248	2.48		8.27965e-19
		0.249	2.49		8.18506e-19
		0.25	2.5		8.09172e-19
		0.251	2.51		7.99959e-19
		0.252	2.52		7.90867e-19
		0.253	2.53		7.81894e-19
		0.254	2.54		7.73036e-19
		0.255	2.55		7.64293e-19
		0.256	2.56		7.55663e-19
		0.257	2.57		7.47143e-19
		0.258	2.58		7.38732e-19
		0.259	2.59		7.30429e-19
		0.26	2.6		7.1963e-19
		0.261	2.61		7.11556e-19
		0.262	2.62		7.03583e-19
		0.263	2.63		6.95711e-19
		0.264	2.64		6.87938e-19
		0.265	2.65		6.80261e-19
		0.266	2.66		6.72681e-19
		0.267	2.67		6.65194e-19
		0.268	2.68		6.578e-19
		0.269	2.69		6.50498e-19
		0.27	2.7		6.43285e-19
		0.271	2.71		6.36161e-19
		0.272	2.72		6.29123e-19
		0.273	2.73		6.22172e-19
		0.274	2.74		6.15304e-19
		0.275	2.75		6.0852e-19
		0.276	2.76		6.01818e-19
		0.277	2.77		5.95197e-19
		0.278	2.78		5.88654e-19
		0.279	2.79		5.8219e-19
		0.28	2.8		6.06904e-19
		0.281	2.81		6.00424e-19
		0.282	2.82		5.94021e-19
		0.283	2.83		5.87694e-19
		0.284	2.84		5.8144e-19
		0.285	2.85		5.7526e-19
		0.286	2.86		5.69151e-19
		0.287	2.87		5.63113e-19
		0.288	2.88		5.57146e-19
		0.289	2.89		5.51247e-19
		0.29	2.9		5.45416e-19
		0.291	2.91		5.39652e-19
		0.292	2.92		5.33954e-19
		0.293	2.93		5.2832e-19
		0.294	2.94		5.22751e-19
		0.295	2.95		5.17245e-19
		0.296	2.96		5.11802e-19
		0.297	2.97		5.0642e-19
		0.298	2.98		5.01098e-19
		0.299	2.99		4.95836e-19
		0.3	3		4.88724e-19
		0.301	3.01		4.83591e-19
		0.302	3.02		4.78516e-19
		0.303	3.03		4.73496e-19
		0.304	3.04		4.68533e-19
		0.305	3.05		4.63624e-19
		0.306	3.06		4.58768e-19
		0.307	3.07		4.53967e-19
		0.308	3.08		4.49217e-19
		0.309	3.09		4.4452e-19
		0.31	3.1		4.39874e-19
		0.311	3.11		4.35278e-19
		0.312	3.12		4.30731e-19
		0.313	3.13		4.26234e-19
		0.314	3.14		4.21785e-19
		0.315	3.15		4.17384e-19
		0.316	3.16		4.1303e-19
		0.317	3.17		4.08723e-19
		0.318	3.18		4.04461e-19
		0.319	3.19		4.00245e-19
		0.32	3.2		4.18974e-19
		0.321	3.21		4.14761e-19
		0.322	3.22		4.10592e-19
		0.323	3.23		4.06467e-19
		0.324	3.24		4.02385e-19
		0.325	3.25		3.98346e-19
		0.326	3.26		3.94348e-19
		0.327	3.27		3.90392e-19
		0.328	3.28		3.86476e-19
		0.329	3.29		3.82601e-19
		0.33	3.3		3.78765e-19
		0.331	3.31		3.74969e-19
		0.332	3.32		3.71211e-19
		0.333	3.33		3.67492e-19
		0.334	3.34		3.6381e-19
		0.335	3.35		3.60166e-19
		0.336	3.36		3.56558e-19
		0.337	3.37		3.52987e-19
		0.338	3.38		3.49452e-19
		0.339	3.39		3.45952e-19
		0.34	3.4		3.41052e-19
		0.341	3.41		3.3763e-19
		0.342	3.42		3.34243e-19
		0.343	3.43		3.30889e-19
		0.344	3.44		3.27568e-19
		0.345	3.45		3.2428e-19
		0.346	3.46		3.21025e-19
		0.347	3.47		3.17801e-19
		0.348	3.48		3.1461e-19
		0.349	3.49		3.11449e-19
		0.35	3.5		3.0832e-19
		0.351	3.51		3.05221e-19
		0.352	3.52		3.02152e-19
		0.353	3.53		2.99113e-19
		0.354	3.54		2.96103e-19
		0.355	3.55		2.93123e-19
		0.356	3.56		2.90171e-19
		0.357	3.57		2.87247e-19
		0.358	3.58		2.84352e-19
		0.359	3.59		2.81484e-19
		0.36	3.6		2.96561e-19
		0.361	3.61		2.93671e-19
		0.362	3.62		2.90808e-19
		0.363	3.63		2.87972e-19
		0.364	3.64		2.85163e-19
		0.365	3.65		2.8238e-19
		0.366	3.66		2.79624e-19
		0.367	3.67		2.76893e-19
		0.368	3.68		2.74187e-19
		0.369	3.69		2.71507e-19
		0.37	3.7		2.68852e-19
		0.371	3.71		2.66221e-19
		0.372	3.72		2.63614e-19
		0.373	3.73		2.61032e-19
		0.374	3.74		2.58474e-19
		0.375	3.75		2.55938e-19
		0.376	3.76		2.53427e-19
		0.377	3.77		2.50938e-19
		0.378	3.78		2.48472e-19
		0.379	3.79		2.46028e-19
		0.38	3.8		2.42477e-19
		0.381	3.81		2.40083e-19
		0.382	3.82		2.37712e-19
		0.383	3.83		2.35361e-19
		0.384	3.84		2.33032e-19
		0.385	3.85		2.30724e-19
		0.386	3.86		2.28437e-19
		0.387	3.87		2.2617e-19
		0.388	3.88		2.23923e-19
		0.389	3.89		2.21696e-19
		0.39	3.9		2.1949e-19
		0.391	3.91		2.17302e-19
		0.392	3.92		2.15135e-19
		0.393	3.93		2.12986e-19
		0.394	3.94		2.10857e-19
		0.395	3.95		2.08746e-19
		0.396	3.96		2.06654e-19
		0.397	3.97		2.0458e-19
		0.398	3.98		2.02524e-19
		0.399	3.99		2.00487e-19
		0.4	4		2.12429e-19
		0.401	4.01		2.1039e-19
		0.402	4.02		2.08369e-19
		0.403	4.03		2.06365e-19
		0.404	4.04		2.04378e-19
		0.405	4.05		2.02409e-19
		0.406	4.06		2.00456e-19
		0.407	4.07		1.9852e-19
		0.408	4.08		1.966e-19
		0.409	4.09		1.94697e-19
		0.41	4.1		1.9281e-19
		0.411	4.11		1.90939e-19
		0.412	4.12		1.89084e-19
		0.413	4.13		1.87244e-19
		0.414	4.14		1.8542e-19
		0.415	4.15		1.83612e-19
		0.416	4.16		1.81819e-19
		0.417	4.17		1.8004e-19
		0.418	4.18		1.78277e-19
		0.419	4.19		1.76528e-19
		0.42	4.2		1.73899e-19
		0.421	4.21		1.72184e-19
		0.422	4.22		1.70482e-19
		0.423	4.23		1.68796e-19
		0.424	4.24		1.67123e-19
		0.425	4.25		1.65463e-19
		0.426	4.26		1.63818e-19
		0.427	4.27		1.62186e-19
		0.428	4.28		1.60568e-19
		0.429	4.29		1.58963e-19
		0.43	4.3		1.57371e-19
		0.431	4.31		1.55792e-19
		0.432	4.32		1.54226e-19
		0.433	4.33		1.52673e-19
		0.434	4.34		1.51132e-19
		0.435	4.35		1.49604e-19
		0.436	4.36		1.48088e-19
		0.437	4.37		1.46585e-19
		0.438	4.38		1.45094e-19
		0.439	4.39		1.43615e-19
		0.44	4.4		1.5344e-19
		0.441	4.41		1.51953e-19
		0.442	4.42		1.50479e-19
		0.443	4.43		1.49016e-19
		0.444	4.44		1.47565e-19
		0.445	4.45		1.46125e-19
		0.446	4.46		1.44696e-19
		0.447	4.47		1.43279e-19
		0.448	4.48		1.41873e-19
		0.449	4.49		1.40479e-19
		0.45	4.5		1.39095e-19
		0.451	4.51		1.37722e-19
		0.452	4.52		1.3636e-19
		0.453	4.53		1.35008e-19
		0.454	4.54		1.33667e-19
		0.455	4.55		1.32336e-19
		0.456	4.56		1.31016e-19
		0.457	4.57		1.29706e-19
		0.458	4.58		1.28407e-19
		0.459	4.59		1.27117e-19
		0.46	4.6		1.25109e-19
		0.461	4.61		1.23842e-19
		0.462	4.62		1.22586e-19
		0.463	4.63		1.21338e-19
		0.464	4.64		1.20101e-19
		0.465	4.65		1.18873e-19
		0.466	4.66		1.17654e-19
		0.467	4.67		1.16445e-19
		0.468	4.68		1.15245e-19
		0.469	4.69		1.14054e-19
		0.47	4.7		1.12872e-19
		0.471	4.71		1.11699e-19
		0.472	4.72		1.10535e-19
		0.473	4.73		1.0938e-19
		0.474	4.74		1.08233e-19
		0.475	4.75		1.07096e-19
		0.476	4.76		1.05966e-19
		0.477	4.77		1.04846e-19
		0.478	4.78		1.03734e-19
		0.479	4.79		1.0263e-19
		0.48	4.8		1.10128e-19
		0.481	4.81		1.09054e-19
		0.482	4.82		1.07989e-19
		0.483	4.83		1.06931e-19
		0.484	4.84		1.05881e-19
		0.485	4.85		1.04839e-19
		0.486	4.86		1.03804e-19
		0.487	4.87		1.02777e-19
		0.488	4.88		1.01758e-19
		0.489	4.89		1.00746e-19
		0.49	4.9		9.97412e-20
		0.491	4.91		9.87439e-20
		0.492	4.92		9.7754e-20
		0.493	4.93		9.67712e-20
		0.494	4.94		9.57956e-20
		0.495	4.95		9.48271e-20
		0.496	4.96		9.38655e-20
		0.497	4.97		9.2911e-20
		0.498	4.98		9.19633e-20
		0.499	4.99		9.10225e-20
		0.5	5		8.95178e-20
		0.501	5.01		8.85927e-20
		0.502	5.02		8.76743e-20
		0.503	5.03		8.67625e-20
		0.504	5.04		8.58572e-20
		0.505	5.05		8.49584e-20
		0.506	5.06		8.4066e-20
		0.507	5.07		8.318e-20
		0.508	5.08		8.23003e-20
		0.509	5.09		8.14268e-20
		0.51	5.1		8.05596e-20
		0.511	5.11		7.96985e-20
		0.512	5.12		7.88435e-20
		0.513	5.13		7.79946e-20
		0.514	5.14		7.71516e-20
		0.515	5.15		7.63146e-20
		0.516	5.16		7.54835e-20
		0.517	5.17		7.46583e-20
		0.518	5.18		7.38388e-20
		0.519	5.19		7.30251e-20
		0.52	5.2		7.91486e-20
		0.521	5.21		7.83512e-20
		0.522	5.22		7.75593e-20
		0.523	5.23		7.67728e-20
		0.524	5.24		7.59918e-20
		0.525	5.25		7.52162e-20
		0.526	5.26		7.44459e-20
		0.527	5.27		7.36809e-20
		0.528	5.28		7.29212e-20
		0.529	5.29		7.21666e-20
		0.53	5.3		7.14173e-20
		0.531	5.31		7.0673e-20
		0.532	5.32		6.99339e-20
		0.533	5.33		6.91997e-20
		0.534	5.34		6.84706e-20
		0.535	5.35		6.77464e-20
		0.536	5.36		6.70272e-20
		0.537	5.37		6.63128e-20
		0.538	5.38		6.56033e-20
		0.539	5.39		6.48986e-20
		0.54	5.4		6.37386e-20
		0.541	5.41		6.3045e-20
		0.542	5.42		6.23561e-20
		0.543	5.43		6.16719e-20
		0.544	5.44		6.09923e-20
		0.545	5.45		6.03172e-20
		0.546	5.46		5.96467e-20
		0.547	5.47		5.89806e-20
		0.548	5.48		5.8319e-20
		0.549	5.49		5.76619e-20
		0.55	5.5		5.70091e-20
		0.551	5.51		5.63606e-20
		0.552	5.52		5.57165e-20
		0.553	5.53		5.50767e-20
		0.554	5.54		5.44411e-20
		0.555	5.55		5.38097e-20
		0.556	5.56		5.31825e-20
		0.557	5.57		5.25595e-20
		0.558	5.58		5.19406e-20
		0.559	5.59		5.13258e-20
		0.56	5.6		5.60694e-20
		0.561	5.61		5.54823e-20
		0.562	5.62		5.48991e-20
		0.563	5.63		5.43196e-20
		0.564	5.64		5.37439e-20
		0.565	5.65		5.31719e-20
		0.566	5.66		5.26036e-20
		0.567	5.67		5.2039e-20
		0.568	5.68		5.1478e-20
		0.569	5.69		5.09206e-20
		0.57	5.7		5.03669e-20
		0.571	5.71		4.98166e-20
		0.572	5.72		4.927e-20
		0.573	5.73		4.87268e-20
		0.574	5.74		4.81871e-20
		0.575	5.75		4.76509e-20
		0.576	5.76		4.7118e-20
		0.577	5.77		4.65886e-20
		0.578	5.78		4.60626e-20
		0.579	5.79		4.55399e-20
		0.58	5.8		4.4658e-20
		0.581	5.81		4.41431e-20
		0.582	5.82		4.36316e-20
		0.583	5.83		4.31233e-20
		0.584	5.84		4.26182e-20
		0.585	5.85		4.21163e-20
		0.586	5.86		4.16176e-20
		0.587	5.87		4.11221e-20
		0.588	5.88		4.06296e-20
		0.589	5.89		4.01403e-20
		0.59	5.9		3.9654e-20
		0.591	5.91		3.91708e-20
		0.592	5.92		3.86907e-20
		0.593	5.93		3.82135e-20
		0.594	5.94		3.77393e-20
		0.595	5.95		3.72681e-20
		0.596	5.96		3.67999e-20
		0.597	5.97		3.63346e-20
		0.598	5.98		3.58721e-20
		0.599	5.99		3.54126e-20
		0.6	6		3.89291e-20
		0.601	6.01		3.85061e-20
		0.602	6.02		3.80857e-20
		0.603	6.03		3.76678e-20
		0.604	6.04		3.72525e-20
		0.605	6.05		3.68397e-20
		0.606	6.06		3.64295e-20
		0.607	6.07		3.60217e-20
		0.608	6.08		3.56165e-20
		0.609	6.09		3.52137e-20
		0.61	6.1		3.48133e-20
		0.611	6.11		3.44154e-20
		0.612	6.12		3.40199e-20
		0.613	6.13		3.36267e-20
		0.614	6.14		3.3236e-20
		0.615	6.15		3.28476e-20
		0.616	6.16		3.24615e-20
		0.617	6.17		3.20778e-20
		0.618	6.18		3.16964e-20
		0.619	6.19		3.13173e-20
		0.62	6.2		3.06645e-20
		0.621	6.21		3.02908e-20
		0.622	6.22		2.99193e-20
		0.623	6.23		2.95501e-20
		0.624	6.24		2.91831e-20
		0.625	6.25		2.88183e-20
		0.626	6.26		2.84557e-20
		0.627	6.27		2.80952e-20
		0.628	6.28		2.77368e-20
		0.629	6.29		2.73806e-20
		0.63	6.3		2.70266e-20
		0.631	6.31		2.66746e-20
		0.632	6.32		2.63247e-20
		0.633	6.33		2.59769e-20
		0.634	6.34		2.56311e-20
		0.635	6.35		2.52874e-20
		0.636	6.36		2.49458e-20
		0.637	6.37		2.46061e-20
		0.638	6.38		2.42685e-20
		0.639	6.39		2.39328e-20
		0.64	6.4		2.65541e-20
		0.641	6.41		2.62509e-20
		0.642	6.42		2.59495e-20
		0.643	6.43		2.56498e-20
		0.644	6.44		2.53519e-20
		0.645	6.45		2.50557e-20
		0.646	6.46		2.47612e-20
		0.647	6.47		2.44684e-20
		0.648	6.48		2.41773e-20
		0.649	6.49		2.38878e-20
		0.65	6.5		2.36001e-20
		0.651	6.51		2.33139e-20
		0.652	6.52		2.30295e-20
		0.653	6.53		2.27466e-20
		0.654	6.54		2.24654e-20
		0.655	6.55		2.21857e-20
		0.656	6.56		2.19077e-20
		0.657	6.57		2.16313e-20
		0.658	6.58		2.13564e-20
		0.659	6.59		2.10831e-20
		0.66	6.6		2.06035e-20
		0.661	6.61		2.03339e-20
		0.662	6.62		2.00659e-20
		0.663	6.63		1.97994e-20
		0.664	6.64		1.95344e-20
		0.665	6.65		1.92709e-20
		0.666	6.66		1.90089e-20
		0.667	6.67		1.87483e-20
		0.668	6.68		1.84893e-20
		0.669	6.69		1.82317e-20
		0.67	6.7		1.79756e-20
		0.671	6.71		1.77209e-20
		0.672	6.72		1.74676e-20
		0.673	6.73		1.72158e-20
		0.674	6.74		1.69654e-20
		0.675	6.75		1.67164e-20
		0.676	6.76		1.64688e-20
		0.677	6.77		1.62226e-20
		0.678	6.78		1.59777e-20
		0.679	6.79		1.57342e-20
		0.68	6.8		1.75525e-20
		0.681	6.81		1.7343e-20
		0.682	6.82		1.71346e-20
		0.683	6.83		1.69274e-20
		0.684	6.84		1.67213e-20
		0.685	6.85		1.65163e-20
		0.686	6.86		1.63125e-20
		0.687	6.87		1.61097e-20
		0.688	6.88		1.59081e-20
		0.689	6.89		1.57076e-20
		0.69	6.9		1.55081e-20
		0.691	6.91		1.53098e-20
		0.692	6.92		1.51125e-20
		0.693	6.93		1.49163e-20
		0.694	6.94		1.47212e-20
		0.695	6.95		1.45272e-20
		0.696	6.96		1.43341e-20
		0.697	6.97		1.41422e-20
		0.698	6.98		1.39513e-20
		0.699	6.99		1.37614e-20
		0.7	7		1.34229e-20
		0.701	7.01		1.32355e-20
		0.702	7.02		1.30491e-20
		0.703	7.03		1.28637e-20
		0.704	7.04		1.26793e-20
		0.705	7.05		1.24959e-20
		0.706	7.06		1.23134e-20
		0.707	7.07		1.2132e-20
		0.708	7.08		1.19515e-20
		0.709	7.09		1.1772e-20
		0.71	7.1		1.15935e-20
		0.711	7.11		1.14159e-20
		0.712	7.12		1.12393e-20
		0.713	7.13		1.10636e-20
		0.714	7.14		1.08889e-20
		0.715	7.15		1.07151e-20
		0.716	7.16		1.05422e-20
		0.717	7.17		1.03702e-20
		0.718	7.18		1.01992e-20
		0.719	7.19		1.0029e-20
		0.72	7.2		1.13095e-20
		0.721	7.21		1.11659e-20
		0.722	7.22		1.10231e-20
		0.723	7.23		1.0881e-20
		0.724	7.24		1.07397e-20
		0.725	7.25		1.05991e-20
		0.726	7.26		1.04593e-20
		0.727	7.27		1.03201e-20
		0.728	7.28		1.01817e-20
		0.729	7.29		1.0044e-20
		0.73	7.3		9.90706e-21
		0.731	7.31		9.7708e-21
		0.732	7.32		9.63525e-21
		0.733	7.33		9.50039e-21
		0.734	7.34		9.36624e-21
		0.735	7.35		9.23278e-21
		0.736	7.36		9.10001e-21
		0.737	7.37		8.96793e-21
		0.738	7.38		8.83652e-21
		0.739	7.39		8.7058e-21
		0.74	7.4		8.46919e-21
		0.741	7.41		8.3401e-21
		0.742	7.42		8.21166e-21
		0.743	7.43		8.08389e-21
		0.744	7.44		7.95678e-21
		0.745	7.45		7.83032e-21
		0.746	7.46		7.7045e-21
		0.747	7.47		7.57934e-21
		0.748	7.48		7.45481e-21
		0.749	7.49		7.33092e-21
		0.75	7.5		7.20766e-21
		0.751	7.51		7.08503e-21
		0.752	7.52		6.96303e-21
		0.753	7.53		6.84165e-21
		0.754	7.54		6.72089e-21
		0.755	7.55		6.60075e-21
		0.756	7.56		6.48121e-21
		0.757	7.57		6.36229e-21
		0.758	7.58		6.24397e-21
		0.759	7.59		6.12624e-21
		0.76	7.6		6.94554e-21
		0.761	7.61		6.85206e-21
		0.762	7.62		6.75905e-21
		0.763	7.63		6.66651e-21
		0.764	7.64		6.57442e-21
		0.765	7.65		6.48279e-21
		0.766	7.66		6.39162e-21
		0.767	7.67		6.3009e-21
		0.768	7.68		6.21063e-21
		0.769	7.69		6.12081e-21
		0.77	7.7		6.03143e-21
		0.771	7.71		5.9425e-21
		0.772	7.72		5.85401e-21
		0.773	7.73		5.76595e-21
		0.774	7.74		5.67833e-21
		0.775	7.75		5.59114e-21
		0.776	7.76		5.50438e-21
		0.777	7.77		5.41805e-21
		0.778	7.78		5.33214e-21
		0.779	7.79		5.24666e-21
		0.78	7.8		5.08997e-21
		0.781	7.81		5.00551e-21
		0.782	7.82		4.92146e-21
		0.783	7.83		4.83783e-21
		0.784	7.84		4.7546e-21
		0.785	7.85		4.67179e-21
		0.786	7.86		4.58937e-21
		0.787	7.87		4.50737e-21
		0.788	7.88		4.42576e-21
		0.789	7.89		4.34455e-21
		0.79	7.9		4.26374e-21
		0.791	7.91		4.18332e-21
		0.792	7.92		4.1033e-21
		0.793	7.93		4.02366e-21
		0.794	7.94		3.94441e-21
		0.795	7.95		3.86555e-21
		0.796	7.96		3.78707e-21
		0.797	7.97		3.70898e-21
		0.798	7.98		3.63126e-21
		0.799	7.99		3.55392e-21
		0.8	8		3.99596e-21
		0.801	8.01		3.94087e-21
		0.802	8.02		3.88603e-21
		0.803	8.03		3.83146e-21
		0.804	8.04		3.77715e-21
		0.805	8.05		3.72309e-21
		0.806	8.06		3.66929e-21
		0.807	8.07		3.61574e-21
		0.808	8.08		3.56245e-21
		0.809	8.09		3.50941e-21
		0.81	8.1		3.45663e-21
		0.811	8.11		3.40409e-21
		0.812	8.12		3.35179e-21
		0.813	8.13		3.29975e-21
		0.814	8.14		3.24795e-21
		0.815	8.15		3.1964e-21
		0.816	8.16		3.14508e-21
		0.817	8.17		3.09401e-21
		0.818	8.18		3.04318e-21
		0.819	8.19		2.99259e-21
		0.82	8.2		2.89917e-21
		0.821	8.21		2.84915e-21
		0.822	8.22		2.79937e-21
		0.823	8.23		2.74983e-21
		0.824	8.24		2.70051e-21
		0.825	8.25		2.65143e-21
		0.826	8.26		2.60258e-21
		0.827	8.27		2.55395e-21
		0.828	8.28		2.50555e-21
		0.829	8.29		2.45738e-21
		0.83	8.3		2.40943e-21
		0.831	8.31		2.3617e-21
		0.832	8.32		2.3142e-21
		0.833	8.33		2.26692e-21
		0.834	8.34		2.21986e-21
		0.835	8.35		2.17302e-21
		0.836	8.36		2.12639e-21
		0.837	8.37		2.07998e-21
		0.838	8.38		2.03379e-21
		0.839	8.39		1.98781e-21
		0.84	8.4		2.29375e-21
		0.841	8.41		2.25916e-21
		0.842	8.42		2.22472e-21
		0.843	8.43		2.19044e-21
		0.844	8.44		2.15632e-21
		0.845	8.45		2.12236e-21
		0.846	8.46		2.08854e-21
		0.847	8.47		2.05488e-21
		0.848	8.48		2.02138e-21
		0.849	8.49		1.98802e-21
		0.85	8.5		1.95482e-21
		0.851	8.51		1.92177e-21
		0.852	8.52		1.88887e-21
		0.853	8.53		1.85611e-21
		0.854	8.54		1.82351e-21
		0.855	8.55		1.79105e-21
		0.856	8.56		1.75874e-21
		0.857	8.57		1.72657e-21
		0.858	8.58		1.69455e-21
		0.859	8.59		1.66267e-21
		0.86	8.6		1.60307e-21
		0.861	8.61		1.57154e-21
		0.862	8.62		1.54016e-21
		0.863	8.63		1.50891e-21
		0.864	8.64		1.47781e-21
		0.865	8.65		1.44685e-21
		0.866	8.66		1.41602e-21
		0.867	8.67		1.38534e-21
		0.868	8.68		1.35479e-21
		0.869	8.69		1.32438e-21
		0.87	8.7		1.2941e-21
		0.871	8.71		1.26396e-21
		0.872	8.72		1.23396e-21
		0.873	8.73		1.20409e-21
		0.874	8.74		1.17435e-21
		0.875	8.75		1.14474e-21
		0.876	8.76		1.11527e-21
		0.877	8.77		1.08593e-21
		0.878	8.78		1.05671e-21
		0.879	8.79		1.02763e-21
		0.88	8.8		1.16639e-21
		0.881	8.81		1.14786e-21
		0.882	8.82		1.1294e-21
		0.883	8.83		1.11103e-21
		0.884	8.84		1.09273e-21
		0.885	8.85		1.07452e-21
		0.886	8.86		1.05638e-21
		0.887	8.87		1.03832e-21
		0.888	8.88		1.02035e-21
		0.889	8.89		1.00245e-21
		0.89	8.9		9.84624e-22
		0.891	8.91		9.66879e-22
		0.892	8.92		9.49211e-22
		0.893	8.93		9.3162e-22
		0.894	8.94		9.14105e-22
		0.895	8.95		8.96665e-22
		0.896	8.96		8.79302e-22
		0.897	8.97		8.62013e-22
		0.898	8.98		8.44799e-22
		0.899	8.99		8.2766e-22
		0.9	9		7.95366e-22
		0.901	9.01		7.78408e-22
		0.902	9.02		7.61524e-22
		0.903	9.03		7.44712e-22
		0.904	9.04		7.27972e-22
		0.905	9.05		7.11304e-22
		0.906	9.06		6.94709e-22
		0.907	9.07		6.78184e-22
		0.908	9.08		6.61731e-22
		0.909	9.09		6.45348e-22
		0.91	9.1		6.29036e-22
		0.911	9.11		6.12794e-22
		0.912	9.12		5.96621e-22
		0.913	9.13		5.80518e-22
		0.914	9.14		5.64483e-22
		0.915	9.15		5.48517e-22
		0.916	9.16		5.3262e-22
		0.917	9.17		5.1679e-22
		0.918	9.18		5.01029e-22
		0.919	9.19		4.85334e-22
		0.92	9.2		3.87122e-22
		0.921	9.21		6.61509e-22
		0.922	9.22		6.45621e-22
		0.923	9.23		6.29801e-22
		0.924	9.24		6.14048e-22
		0.925	9.25		5.98361e-22
		0.926	9.26		5.8274e-22
		0.927	9.27		5.67185e-22
		0.928	9.28		5.51696e-22
		0.929	9.29		5.36273e-22
		0.93	9.3		5.20914e-22
		0.931	9.31		5.0562e-22
		0.932	9.32		4.9039e-22
		0.933	9.33		4.75224e-22
		0.934	9.34		4.60122e-22
		0.935	9.35		4.45084e-22
		0.936	9.36		4.30109e-22
		0.937	9.37		4.15196e-22
		0.938	9.38		4.00346e-22
		0.939	9.39		3.85559e-22
		0.94	9.4		3.56927e-22
		0.941	9.41		3.42292e-22
		0.942	9.42		3.27719e-22
		0.943	9.43		3.13207e-22
		0.944	9.44		2.98755e-22
		0.945	9.45		2.84364e-22
		0.946	9.46		2.70033e-22
		0.947	9.47		2.55762e-22
		0.948	9.48		2.4155e-22
		0.949	9.49		2.27398e-22
		0.95	9.5		2.13304e-22
		0.951	9.51		1.9927e-22
		0.952	9.52		1.85293e-22
		0.953	9.53		1.71375e-22
		0.954	9.54		1.57515e-22
		0.955	9.55		1.43712e-22
		0.956	9.56		1.29967e-22
		0.957	9.57		1.16279e-22
		0.958	9.58		1.02648e-22
		0.959	9.59		8.9073e-23
		0.96	9.6		0
